# Supplementary material for: A catalogue of putative unique transcripts from Douglas-fir (Pseudotsuga menziesii) based on 454 transcriptome sequencing of genetically diverse, drought stressed seedlings
Source: PubMed Central journal article supplement (PMC3637476; doi:10.1186/1471-2164-13-673), 2012-11-28
Supplement: 1471-2164-13-673-S6.pdf [file 1471-2164-13-673-S6.pdf]

Additional Table 1: Number of identical BLASTX hits of different combination of groups after the keyword search.

| Group(s)                  | Number of equal BLASTX hits |
|---------------------------|-----------------------------|
| <i>c cms cs ms</i>        | 1                           |
| <i>cm ms</i>              | 1                           |
| <i>cms cs ms s</i>        | 1                           |
| <i>c cm cms cs m s</i>    | 1                           |
| <i>cs m</i>               | 1                           |
| <i>c cm cms s</i>         | 1                           |
| <i>c cm cms m</i>         | 1                           |
| <i>c cms cs m s</i>       | 1                           |
| <i>c cm</i>               | 1                           |
| <i>cms cs ms</i>          | 1                           |
| <i>m s</i>                | 1                           |
| <i>cm cms s</i>           | 1                           |
| <i>cms cs m s</i>         | 1                           |
| <i>cm cms ms</i>          | 1                           |
| <i>c cms ms</i>           | 1                           |
| <i>c cm cms cs m ms s</i> | 1                           |
| <i>c s</i>                | 1                           |
| <i>cm s</i>               | 1                           |
| <i>cms m s</i>            | 2                           |
| <i>c cms cs</i>           | 2                           |
| <i>c cm cms cs</i>        | 2                           |
| <i>c cm cms m ms s</i>    | 2                           |
| <i>c cm cms</i>           | 2                           |
| <i>cm cms m</i>           | 2                           |
| <i>m ms</i>               | 2                           |
| <i>c cms cs s</i>         | 3                           |
| <i>c cms s</i>            | 3                           |
| <i>cms cs m</i>           | 3                           |
| <i>cms ms s</i>           | 4                           |
| <i>cs s</i>               | 4                           |
| <i>ms</i>                 | 4                           |
| <i>cm cms cs</i>          | 5                           |
| <i>cms cs s</i>           | 8                           |
| <i>cms m</i>              | 9                           |
| <i>cms ms</i>             | 13                          |
| <i>m</i>                  | 14                          |
| <i>cm cms</i>             | 17                          |
| <i>cm</i>                 | 19                          |
| <i>cs</i>                 | 20                          |
| <i>s</i>                  | 21                          |
| <i>c</i>                  | 24                          |
| <i>cms s</i>              | 27                          |
| <i>cms cs</i>             | 29                          |
| <i>c cms</i>              | 30                          |
| <i>cms</i>                | 557                         |

Number of equal BLASTX hits (only results from the keyword search are considered) of isotigs (non-singleton PUTs) from different set(s) of groups (see Figure 3). In the not listed combinations of sets, there were no equal BLASTX hits. *c* = control, *m* = mild stress, *s* = severe stress, *cm* = control and mild stress, *cs* = control and severe stress, *ms* = mild and severe stress, *cms* = control, mild and severe stress.
