# Supplementary material for: A catalogue of putative unique transcripts from Douglas-fir (Pseudotsuga menziesii) based on 454 transcriptome sequencing of genetically diverse, drought stressed seedlings
Source: PubMed Central journal article supplement (PMC3637476; doi:10.1186/1471-2164-13-673), 2012-11-28
Supplement: 1471-2164-13-673-S7.pdf [file 1471-2164-13-673-S7.pdf]

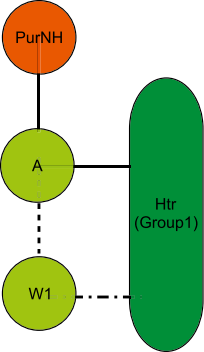

A

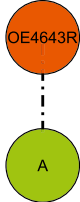

B

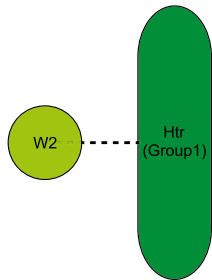

C

## Interaction

— detected in one-step bait fishing (static)

- - - detected in two-step bait fishing (dynamic)

- · - detected in one- and two-step bait fishing (low dynamic or prey has unoccupied binding site for bait)
