# Supplementary material for: A catalogue of putative unique transcripts from Douglas-fir (Pseudotsuga menziesii) based on 454 transcriptome sequencing of genetically diverse, drought stressed seedlings
Source: PubMed Central journal article supplement (PMC3637476; doi:10.1186/1471-2164-13-673), 2012-11-28
Supplement: 1471-2164-13-673-S9.pdf [file 1471-2164-13-673-S9.pdf]

Additional Table 2: Composition of the cDNA libraries.

| Library | Provenance    | # individuals |
|---------|---------------|---------------|
| DCNC    | Lowry Lake    | 6             |
|         | Twin Harbors  | 6             |
|         | Pend Oreille  | 5             |
| DCNM    | Lowry Lake    | 5             |
|         | Twin Harbors  | 5             |
|         | Pend Oreille  | 4             |
| DCNS    | Lowry Lake    | 5             |
|         | Twin Harbors  | 5             |
|         | Pend Oreille  | 4             |
| DINC    | Twin Lake     | 6             |
|         | Salmon Arms   | 6             |
|         | Prince George | 6             |
|         | Fort Collins  | 6             |
|         | Raton         | 6             |
| DINM    | Twin Lake     | 5             |
|         | Salmon Arms   | 5             |
|         | Prince George | 4             |
|         | Fort Collins  | 4             |
|         | Raton         | 5             |
| DINS    | Twin Lake     | 4             |
|         | Salmon Arms   | 4             |
|         | Prince George | 4             |
|         | Fort Collins  | 4             |
|         | Raton         | 5             |
| DIWC    | Twin Lake     | 7             |
|         | Salmon Arms   | 3             |
|         | Prince George | 4             |
|         | Fort Collins  | 3             |
|         | Raton         | 3             |
| DIWM    | Twin Lake     | 4             |
|         | Salmon Arms   | 4             |
|         | Prince George | 4             |
|         | Fort Collins  | 3             |
|         | Raton         | 5             |
| DIWS    | Twin Lake     | 3             |
|         | Salmon Arms   | 4             |
|         | Prince George | 4             |
|         | Fort Collins  | 3             |
|         | Raton         | 3             |
| DCWC    | Lowry Lake    | 7             |
|         | Twin Harbors  | 5             |
|         | Pend Oreille  | 5             |
| DCWM    | Lowry Lake    | 6             |
|         | Twin Harbors  | 6             |
|         | Pend Oreille  | 4             |
| DCWS    | Lowry Lake    | 5             |
|         | Twin Harbors  | 5             |
|         | Pend Oreille  | 4             |

Additional Table 3: Origin of the provenances in detail.

| Variety  | Provenance    | Country and province | Elevation   | Climate                        | Experiment code | Nursery code |
|----------|---------------|----------------------|-------------|--------------------------------|-----------------|--------------|
| Costal   | Lowry Lake    | Canada, BC           | 185 m       | very moist                     | BC2             | FDC 1294     |
| Costal   | Twin Harbors  | USA, WA              | 0-1000 m    | very moist                     | WA1             | FDC SP07-33  |
| Costal   | Pend Oreille  | USA, WA              | 2800-3500 m | montane/dry                    | WA2             | FDC PI06-144 |
| Interior | Fort Collins  | USA, CO              | 2500 m      | montane/dry                    | CO              | FDI 123      |
| Interior | Raton         | USA, NM              | 2300 m      | montane/dry                    | NM              | FDI unkown   |
| Interior | Prince George | Canada, BC           | 850 m       | Northern limit<br>of range/dry | BC6             | FDI 44913    |
| Interior | Salmon Arms   | Canada, BC           | 850 m       | dry                            | BC3             | FDI 39924    |
| Interior | Twin Lake     | Canada, BC           | 1067 m      | very dry                       | BC1             | FDI 2053     |
